# Supplementary material for: Modified CLEC3A-Derived Antimicrobial Peptides Lead to Enhanced Antimicrobial Activity against Drug-Resistant Bacteria
Source: MDPI journal article supplement (doi:10.3390/antibiotics12101532), 2023-10-11
Supplement: s1 [file s1]

# Modified CLEC3A-derived Antimicrobial Peptides Lead to Enhanced Antimicrobial Activity against Drug-resistant Bacteria

Denise Meinberger<sup>1</sup>, Marco G. Drexelius<sup>2,3</sup>, Joshua Grabeck<sup>2,3</sup>, Gabriele Hermes<sup>1</sup>, Annika Roth<sup>1</sup>, Dzamal Elezagic<sup>1</sup>, Ines Neundorff<sup>2,3</sup>, Thomas Streichert<sup>1</sup>, Andreas R. Klatt<sup>1,\*</sup>.

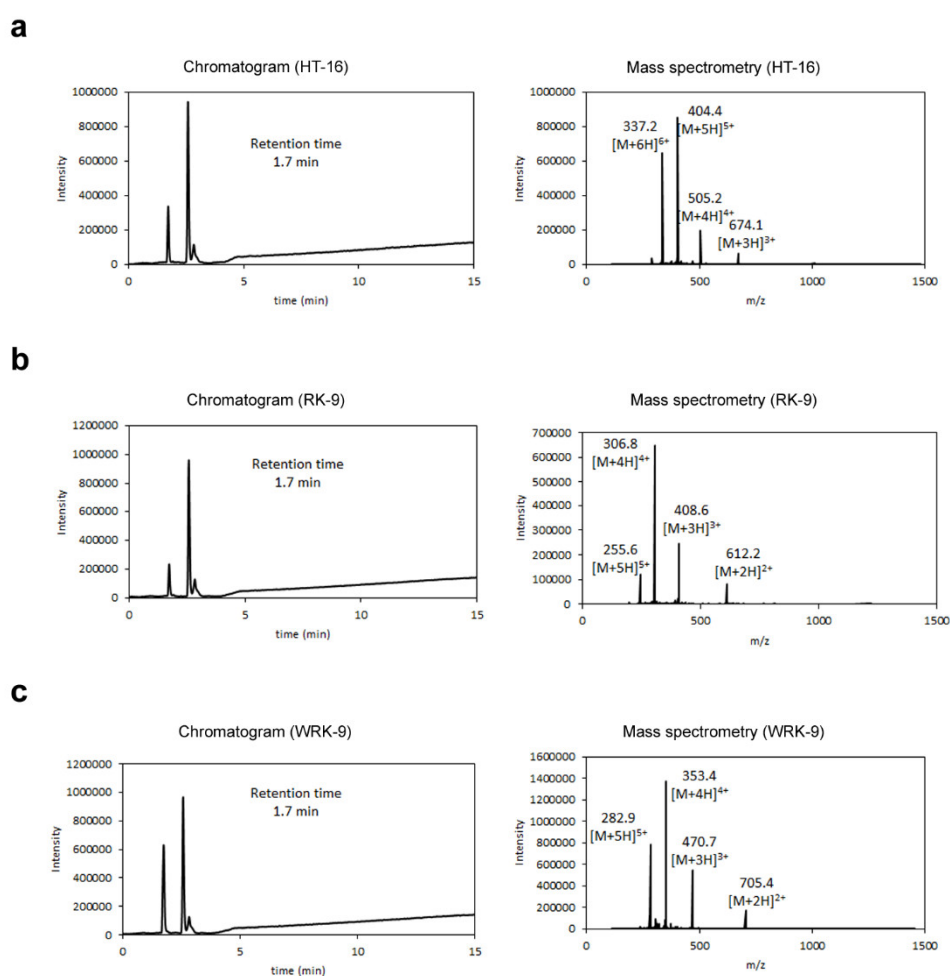

**Supplementary Figure S1 Chromatogram (left) and mass spectrometry data (right) verifying the identity of the peptides after synthesis. Diagrams for HT-16 (A) and its derived modified peptides RK-9 (B), and WRK-9 (C)**

**a**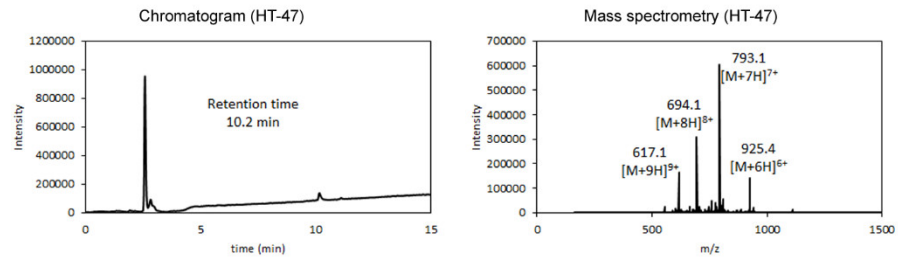**b**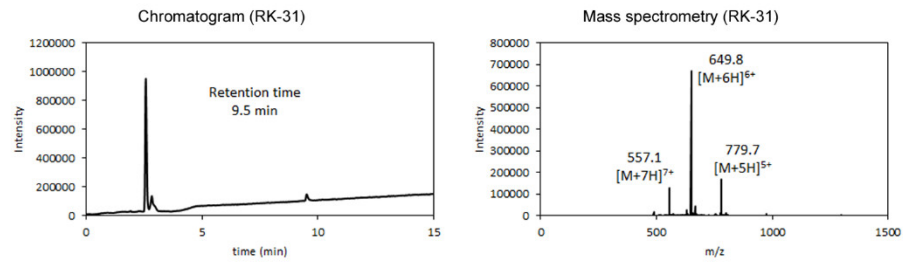**c**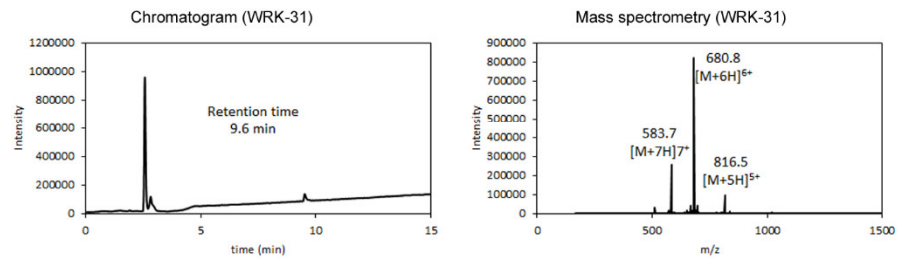**d**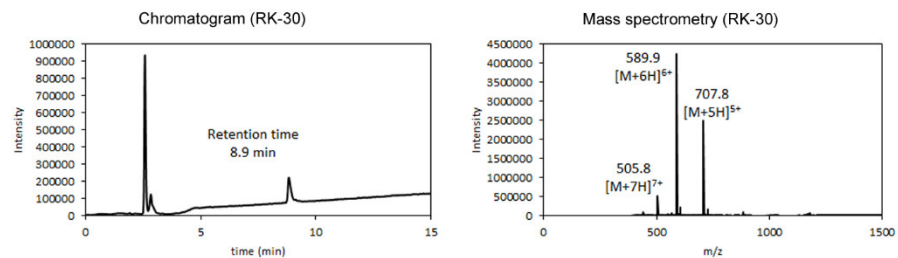**e**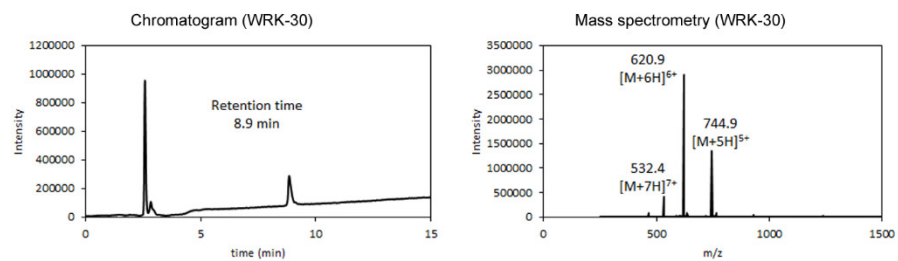

**Supplementary Figure S2 Chromatogram (left) and mass spectrometry data (right) verifying the identity of the peptides after synthesis. Diagrams for HT-47 (A) and its derived modified peptides RK-31 (B), WRK-31 (C), RK-30 (D), and WRK-30 (E)**

**Supplementary Table S1 Peptide concentrations used in the antimicrobial activity assay**

| Bacterial strain      | Peptides                                                                                                | Used peptide concentrations ( $\mu\text{M}$ ) |     |      |      |      |      |      |      |      |      |
|-----------------------|---------------------------------------------------------------------------------------------------------|-----------------------------------------------|-----|------|------|------|------|------|------|------|------|
| <i>Ps. aeruginosa</i> | LL-37, ST-16 (Ctrl 1), HT-16, DK-29 (Ctrl 2), HT-47, RK-9, WRK-9, RK-31, WRK-31, RK-30, WRK-30, dWRK-30 | 5                                             | 2.5 | 1.25 | 0.63 | 0.31 | 0.16 | 0.08 | 0.04 | 0.02 | 0.01 |
| <i>S. aureus</i>      | LL-37, ST-16 (Ctrl 1), HT-16, DK-29 (Ctrl 2), HT-47, RK-9, WRK-9, RK-31, WRK-31, RK-30, WRK-30, dWRK-30 | 5                                             | 2.5 | 1.25 | 0.63 | 0.31 | 0.16 | 0.08 | 0.04 | 0.02 | 0.01 |
| <i>MRSA</i>           | LL-37, ST-16 (Ctrl 1), HT-16, DK-29 (Ctrl 2), HT-47, RK-9, WRK-9, RK-31, WRK-31, RK-30, WRK-30, dWRK-30 | 10                                            | 5   | 2.5  | 1.25 | 0.63 | 0.31 | 0.16 | 0.08 | 0.04 | 0.02 |
|                       | LL-37, DK-29 (Ctrl 2), WRK-30, dWRK-30                                                                  | 5                                             | 2.5 | 1.25 | 0.63 | 0.31 | 0.16 | 0.08 | 0.04 | 0.02 | 0.01 |

**Supplementary Table S2 Peptide concentrations used in the cytotoxicity assay**

| Incubation time (h) | Peptides                                                                        | Used peptide concentrations ( $\mu\text{M}$ ) |    |    |
|---------------------|---------------------------------------------------------------------------------|-----------------------------------------------|----|----|
| 24                  | LL-37, ST-16 (Ctrl 1), HT-16, DK-29 (Ctrl 2), HT-47, RK-9, WRK-9, RK-30, WRK-30 | 0.3                                           | 3  | 30 |
|                     | LL-37, DK-29 (Ctrl 2), HT-47, WRK-30, dWRK-30                                   | 40                                            | 60 | 80 |
| 96                  | LL-37, ST-16 (Ctrl 1), HT-16, DK-29 (Ctrl 2), HT-47, RK-9, WRK-9, RK-30, WRK-30 | 0.3                                           | 3  | 30 |

**Supplementary Table S3 Time points used for taking samples in the Biostability assay**

| Peptide        | Time points for sampling |        |        |      |
|----------------|--------------------------|--------|--------|------|
| <b>HT-47</b>   | 5 min                    | 10 min | 6 h    | 8 h  |
| <b>WRK-30</b>  | 5 min                    | 10 min | 30 min | 1 h  |
| <b>dWRK-30</b> | 5 min                    | 10 min | 24 h   | 96 h |



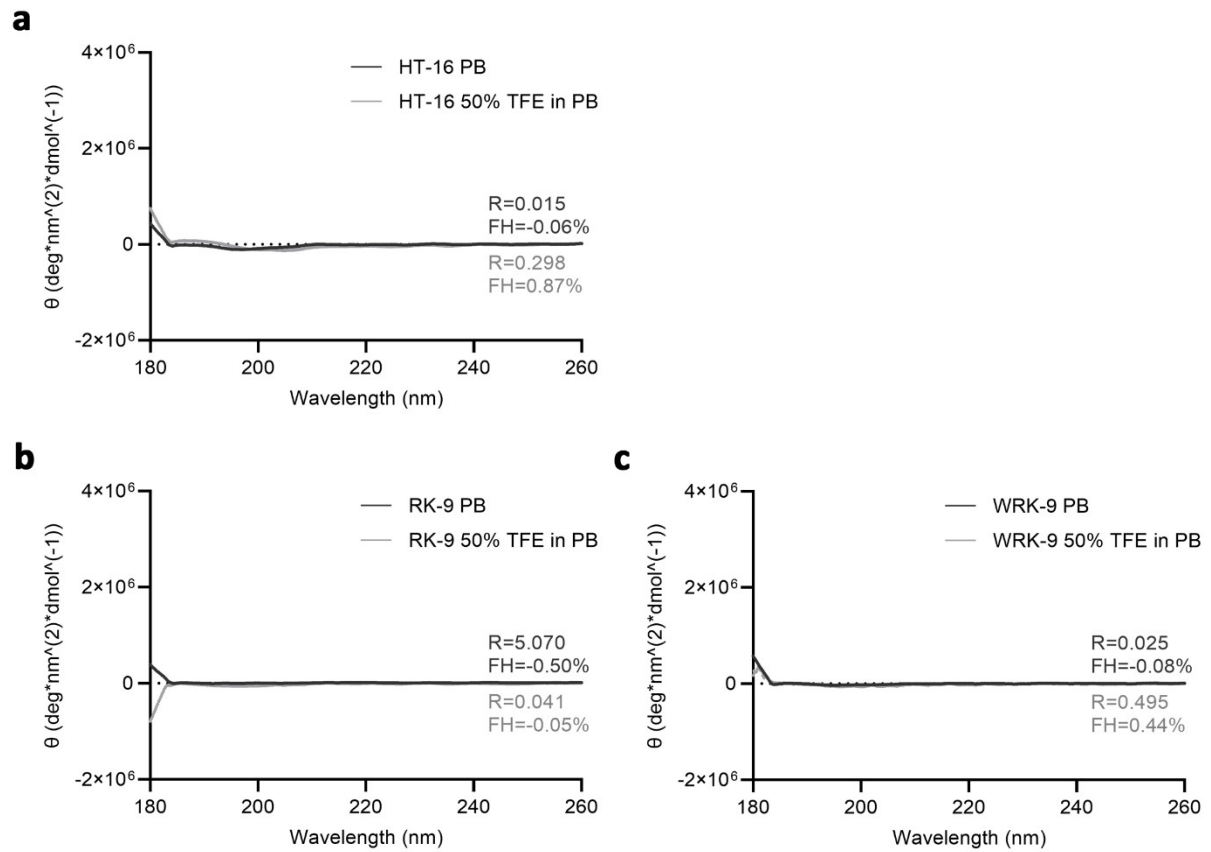

**Supplementary Figure S4 Circular dichroism (CD) spectroscopy of CLEC3A-derived peptides HT-16, RK-9, and WRK-9.** (a) CD-spectroscopy of HT-16 dissolved in phosphate buffer (PB) (black) and 50% TFE in PB (dark grey). (b) CD-spectroscopy of RK-9 dissolved in phosphate buffer (PB) (black) and 50% TFE in PB (dark grey). (c) CD-spectroscopy of WRK-9 dissolved in phosphate buffer (PB) (black) and 50% TFE in PB (dark grey). R-values were calculated by forming the ratio of the molar ellipticity values at 222 nm and 207 nm. R-values of R=1 describe a perfectly formed  $\alpha$ -helix. The fractional helicity (FH) of the peptides was calculated from the molar ellipticity values at 222 nm as described in the methods section. All CD-spectroscopy experiments were performed three times (n=3).

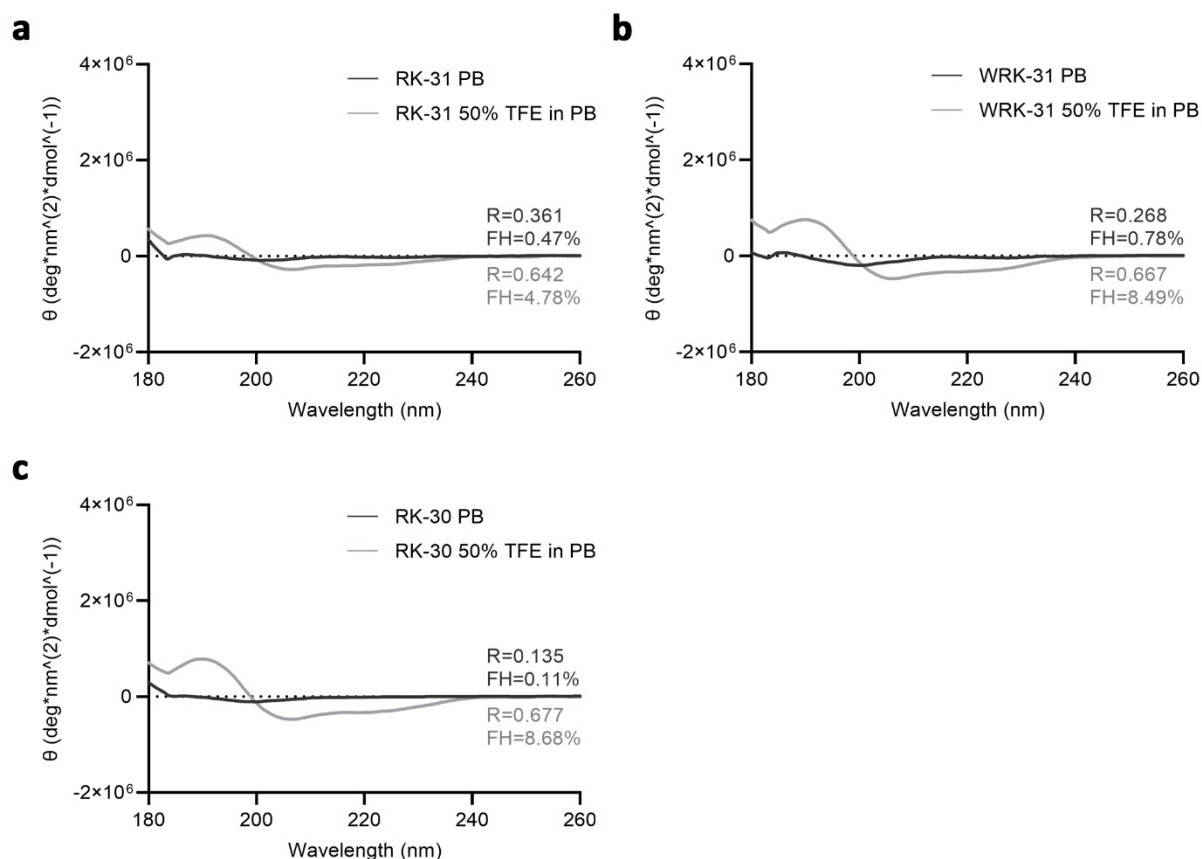

**Supplementary Figure S5 Circular dichroism (CD) spectroscopy of CLEC3A-derived peptides RK-31, WRK-31, and RK-30.** (a) CD-spectroscopy of RK-31 dissolved in phosphate buffer (PB) (black) and 50% TFE in PB (dark grey). (b) CD-spectroscopy of WRK-31 dissolved in phosphate buffer (PB) (black) and 50% TFE in PB (dark grey). (c) CD-spectroscopy of RK-30 dissolved in phosphate buffer (PB) (black) and 50% TFE in PB (dark grey). R-values were calculated by forming the ratio of the molar ellipticity values at 222 nm and 207 nm. R-values of R=1 describe a perfectly formed  $\alpha$ -helix. The fractional helicity (FH) of the peptides was calculated from the molar ellipticity values at 222 nm as described in the methods section. All CD-spectroscopy experiments were performed three times (n=3).

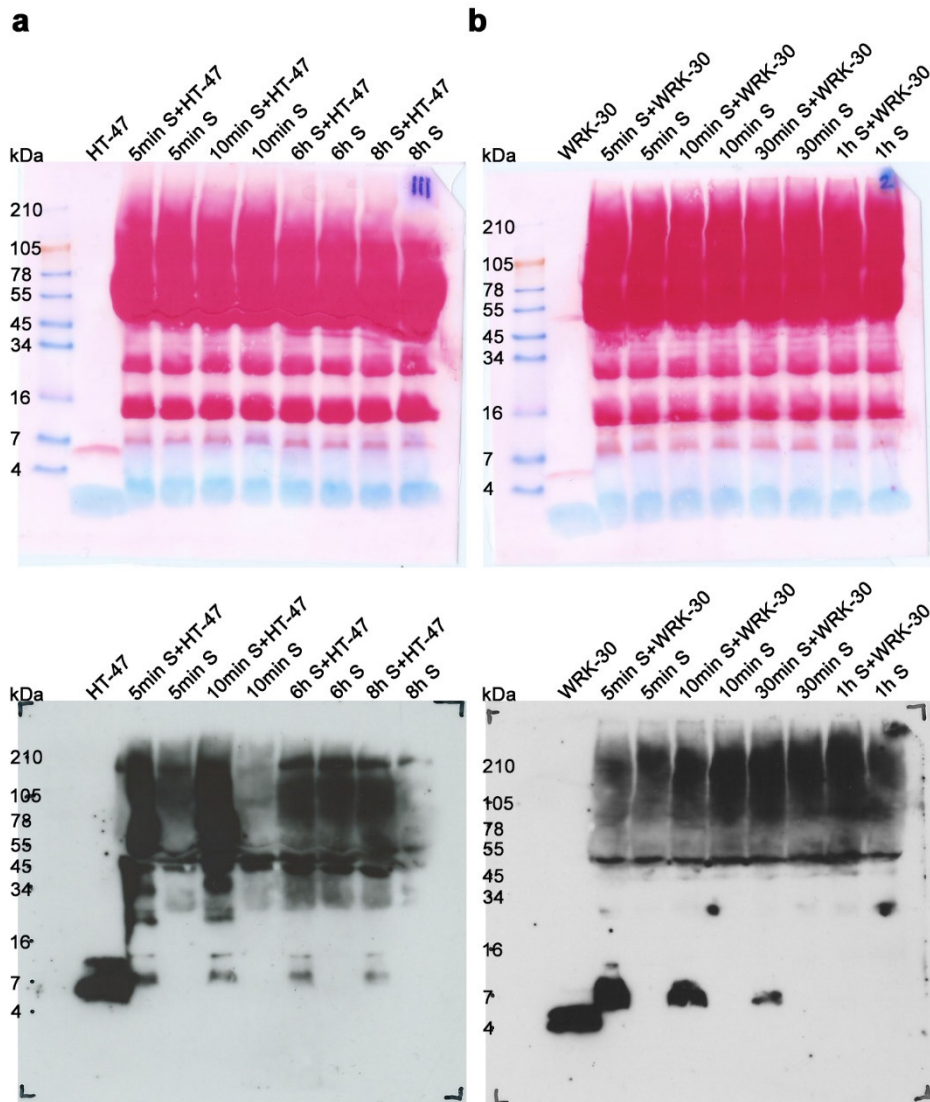

**Supplementary Figure S6 Ponceau and immunoblots of the biostability assays of HT-47 (A) and WRK-30 (B).** (A) Immunoblot of HT-47 samples incubated in murine serum (S) for 5 min, 10 min, 6 h, and 8 h using an  $\alpha$ -WRK-30 antibody for detection. A sample of only HT-47 in water and samples of serum (S) without the peptide incubated for the same time periods were used as controls. The figure shows an exposure time of 1 min with representative ponceau (top) and antibody (bottom) stainings in their uncropped, full size. (B) Immunoblot of WRK-30 samples incubated in murine serum (S) for 5 min, 10 min, 30 min, and 1 h using an  $\alpha$ -WRK-30 antibody for detection. A sample of only WRK-30 in water and samples of serum (S) without the peptide incubated for the same time periods were used as controls. The figure shows an exposure time of 10 min (representative (n=3) ponceau (top) and antibody (bottom) stainings in their uncropped, full size)

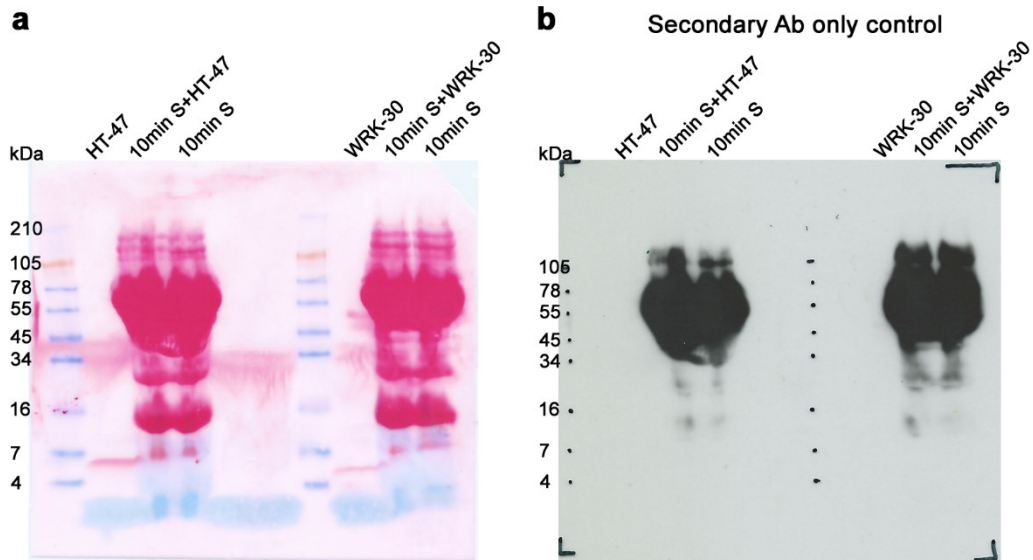

**Supplementary Figure S7 Ponceau and immunoblots of the secondary antibody (Ab) only control of the biostability assays.** Immunoblot of HT-47 and WRK-30 samples incubated in murine serum (S) for 10 min using an  $\alpha$ -rabbit IgG antibody for detection. A sample of only HT-47 and WRK-30 in water and samples of serum (S) without the peptide incubated for the same time periods were used as controls. The figure shows an exposure time of 10 min: (A) ponceau and (B) antibody stainings of an n=1 in their uncropped, full size

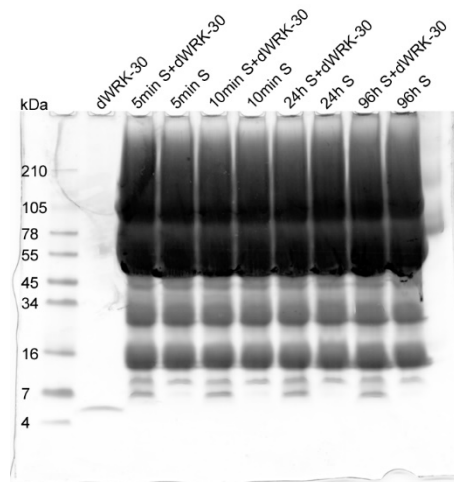

**Supplementary Figure S8 Coomassie staining of the biostability assays for dWRK-30.** SDS-PAGE of dWRK-30 samples incubated in murine serum (S) for 5 min, 10 min, 24 h, and 96 h using Coomassie brilliant blue for detection. A sample of only dWRK-30 in water and samples of serum (S) without the peptide incubated for the same time periods were used as controls. (A). The figure shows a representative SDS-PAGE stained with Coomassie in its uncropped, full size
